# Supplementary material for: Modelling intentions to provide smoking cessation support among mental health professionals in the Netherlands
Source: Tob Induc Dis. 2016 Aug 26;14(1):32. doi: 10.1186/s12971-016-0096-5 (PMC5000432; doi:10.1186/s12971-016-0096-5)
Supplement: Additional file 2: — Covariance matrices of the fitted structural equation models. (XLSX 50 kb) [file 12971_2016_96_MOESM2_ESM.xlsx]

## Sheet: Model 1
	v1190a	v1010	v39110a	g2	g2a	g2b	att4_2	att4_4	att4_5	att4_7	att316_1	att4_1	att4_3	att4_6	att4_8	att4_12	att4_13	att316_2	pbc1_1	pbc1_5	pbc1_6	pbc1_7	sn1_2	sn1_5	sn9_1	sn9_2	int2_1	int2_2	int2_3	int2_4
v1190a	1	-0.956011	-0.87357	1.34246e-18	2.40423e-18	1.24556e-18	-0.268849	-0.313999	-0.299471	-0.242557	-0.314078	-0.287445	-0.22633	-0.261962	-0.311331	-0.274064	-0.302646	-0.307889	0	0	0	0	0	0	0	0	-0.234063	-0.219385	-0.156005	-0.186524
v1010	-0.956011	1	0.981762	-1.50873e-18	-2.70199e-18	-1.39983e-18	0.302146	0.352887	0.33656	0.272598	0.352977	0.323045	0.254361	0.294406	0.34989	0.308007	0.340129	0.346021	0	0	0	0	0	0	0	0	0.263051	0.246556	0.175326	0.209625
v39110a	-0.87357	0.981762	1	-1.37862e-18	-2.46899e-18	-1.27911e-18	0.276091	0.322456	0.307537	0.249091	0.322538	0.295188	0.232426	0.269018	0.319717	0.281446	0.310798	0.316183	0	0	0	0	0	0	0	0	0.240367	0.225295	0.160207	0.191548
g2	1.34246e-18	-1.50873e-18	-1.37862e-18	1	1.32497	0.686431	7.79703e-18	9.10643e-18	8.6851e-18	7.03453e-18	9.10875e-18	8.33634e-18	6.56391e-18	7.59729e-18	9.02907e-18	7.94827e-18	8.7772e-18	8.92925e-18	0.345286	-0.387141	0.398406	-0.306563	-1.40094e-18	-1.1618e-18	-1.20479e-18	-1.47031e-18	0.499884	0.468538	0.333178	0.398357
g2a	2.40423e-18	-2.70199e-18	-2.46899e-18	1.32497	4.12345	1.22934	1.39638e-17	1.63088e-17	1.55542e-17	1.25982e-17	1.6313e-17	1.49296e-17	1.17554e-17	1.36061e-17	1.61703e-17	1.42346e-17	1.57192e-17	1.59915e-17	0.618376	-0.693336	0.713511	-0.549027	-2.50895e-18	-2.08067e-18	-2.15768e-18	-2.6332e-18	0.895249	0.839111	0.596692	0.713421
g2b	1.24556e-18	-1.39983e-18	-1.27911e-18	0.686431	1.22934	1	7.23424e-18	8.44913e-18	8.05821e-18	6.52678e-18	8.45128e-18	7.73463e-18	6.09013e-18	7.04892e-18	8.37736e-18	7.37457e-18	8.14367e-18	8.28475e-18	0.320363	-0.359198	0.36965	-0.284436	-1.29982e-18	-1.07794e-18	-1.11783e-18	-1.36419e-18	0.463803	0.43472	0.309129	0.369603
att4_2	-0.268849	0.302146	0.276091	7.79703e-18	1.39638e-17	7.23424e-18	1	0.573273	0.546749	0.442841	0.573418	0.524794	0.413215	0.478268	0.568403	0.500363	0.552547	0.562119	3.83696e-18	-4.30207e-18	4.42726e-18	-3.40666e-18	-5.14501e-18	-4.26676e-18	-4.42467e-18	-5.3998e-18	0.440586	0.412958	0.293655	0.351102
att4_4	-0.313999	0.352887	0.322456	9.10643e-18	1.63088e-17	8.44913e-18	0.573273	1	0.638568	0.51721	0.669716	0.612926	0.482608	0.558587	0.663858	0.584393	0.645339	0.656519	4.48132e-18	-5.02455e-18	5.17075e-18	-3.97876e-18	-6.00904e-18	-4.9833e-18	-5.16773e-18	-6.30663e-18	0.514577	0.482309	0.342971	0.410065
att4_5	-0.299471	0.33656	0.307537	8.6851e-18	1.55542e-17	8.05821e-18	0.546749	0.638568	1	0.49328	0.63873	0.584567	0.460279	0.532742	0.633143	0.557354	0.615481	0.626143	4.27398e-18	-4.79207e-18	4.93151e-18	-3.79467e-18	-5.73102e-18	-4.75274e-18	-4.92863e-18	-6.01483e-18	0.490768	0.459994	0.327102	0.391092
att4_7	-0.242557	0.272598	0.249091	7.03453e-18	1.25982e-17	6.52678e-18	0.442841	0.51721	0.49328	1	0.517342	0.473472	0.372805	0.431497	0.512816	0.451431	0.498511	0.507147	3.46173e-18	-3.88136e-18	3.9943e-18	-3.07351e-18	-4.64186e-18	-3.8495e-18	-3.99196e-18	-4.87174e-18	0.3975	0.372574	0.264938	0.316766
att316_1	-0.314078	0.352977	0.322538	9.10875e-18	1.6313e-17	8.45128e-18	0.573418	0.669716	0.63873	0.517342	1	0.613081	0.482731	0.558729	0.664027	0.584541	0.645503	0.656686	4.48246e-18	-5.02583e-18	5.17207e-18	-3.97977e-18	-6.01057e-18	-4.98457e-18	-5.16904e-18	-6.30823e-18	0.514707	0.482432	0.343058	0.410169
att4_1	-0.287445	0.323045	0.295188	8.33634e-18	1.49296e-17	7.73463e-18	0.524794	0.612926	0.584567	0.473472	0.613081	1	0.441796	0.51135	0.607719	0.534973	0.590766	0.601	4.10236e-18	-4.59965e-18	4.73349e-18	-3.64229e-18	-5.50089e-18	-4.56189e-18	-4.73072e-18	-5.7733e-18	0.471061	0.441523	0.313967	0.375387
att4_3	-0.22633	0.254361	0.232426	6.56391e-18	1.17554e-17	6.09013e-18	0.413215	0.482608	0.460279	0.372805	0.482731	0.441796	1	0.402629	0.478508	0.42123	0.46516	0.473219	3.23013e-18	-3.62169e-18	3.72708e-18	-2.86789e-18	-4.33131e-18	-3.59196e-18	-3.7249e-18	-4.54581e-18	0.370906	0.347648	0.247213	0.295574
att4_6	-0.261962	0.294406	0.269018	7.59729e-18	1.36061e-17	7.04892e-18	0.478268	0.558587	0.532742	0.431497	0.558729	0.51135	0.402629	1	0.553842	0.487545	0.538392	0.547719	3.73866e-18	-4.19187e-18	4.31384e-18	-3.31939e-18	-5.01321e-18	-4.15746e-18	-4.31132e-18	-5.26147e-18	0.429299	0.402379	0.286132	0.342108
att4_8	-0.311331	0.34989	0.319717	9.02907e-18	1.61703e-17	8.37736e-18	0.568403	0.663858	0.633143	0.512816	0.664027	0.607719	0.478508	0.553842	1	0.579428	0.639857	0.650942	4.44325e-18	-4.98186e-18	5.12683e-18	-3.94496e-18	-5.958e-18	-4.94097e-18	-5.12383e-18	-6.25305e-18	0.510205	0.478212	0.340057	0.406581
att4_12	-0.274064	0.308007	0.281446	7.94827e-18	1.42346e-17	7.37457e-18	0.500363	0.584393	0.557354	0.451431	0.584541	0.534973	0.42123	0.487545	0.579428	1	0.563265	0.573022	3.91138e-18	-4.38552e-18	4.51313e-18	-3.47274e-18	-5.24481e-18	-4.34952e-18	-4.51049e-18	-5.50454e-18	0.449132	0.420969	0.299351	0.357912
att4_13	-0.302646	0.340129	0.310798	8.7772e-18	1.57192e-17	8.14367e-18	0.552547	0.645339	0.615481	0.498511	0.645503	0.590766	0.46516	0.538392	0.639857	0.563265	1	0.632783	4.3193e-18	-4.84289e-18	4.98381e-18	-3.83491e-18	-5.79179e-18	-4.80314e-18	-4.9809e-18	-6.07862e-18	0.495973	0.464872	0.330571	0.395239
att316_2	-0.307889	0.346021	0.316183	8.92925e-18	1.59915e-17	8.28475e-18	0.562119	0.656519	0.626143	0.507147	0.656686	0.601	0.473219	0.547719	0.650942	0.573022	0.632783	1	4.39413e-18	-4.92679e-18	5.07015e-18	-3.90135e-18	-5.89213e-18	-4.88635e-18	-5.06719e-18	-6.18392e-18	0.504565	0.472925	0.336298	0.402086
pbc1_1	0	0	0	0.345286	0.618376	0.320363	3.83696e-18	4.48132e-18	4.27398e-18	3.46173e-18	4.48246e-18	4.10236e-18	3.23013e-18	3.73866e-18	4.44325e-18	3.91138e-18	4.3193e-18	4.39413e-18	1	-0.402485	0.414197	-0.318713	0	0	0	0	0.297994	0.279308	0.198616	0.237471
pbc1_5	0	0	0	-0.387141	-0.693336	-0.359198	-4.30207e-18	-5.02455e-18	-4.79207e-18	-3.88136e-18	-5.02583e-18	-4.59965e-18	-3.62169e-18	-4.19187e-18	-4.98186e-18	-4.38552e-18	-4.84289e-18	-4.92679e-18	-0.402485	1	-0.464406	0.357348	0	0	0	0	-0.334117	-0.313166	-0.222693	-0.266257
pbc1_6	0	0	0	0.398406	0.713511	0.36965	4.42726e-18	5.17075e-18	4.93151e-18	3.9943e-18	5.17207e-18	4.73349e-18	3.72708e-18	4.31384e-18	5.12683e-18	4.51313e-18	4.98381e-18	5.07015e-18	0.414197	-0.464406	1	-0.367746	0	0	0	0	0.343839	0.322278	0.229173	0.274005
pbc1_7	0	0	0	-0.306563	-0.549027	-0.284436	-3.40666e-18	-3.97876e-18	-3.79467e-18	-3.07351e-18	-3.97977e-18	-3.64229e-18	-2.86789e-18	-3.31939e-18	-3.94496e-18	-3.47274e-18	-3.83491e-18	-3.90135e-18	-0.318713	0.357348	-0.367746	1	0	0	0	0	-0.264575	-0.247985	-0.176342	-0.210839
sn1_2	0	0	0	-1.40094e-18	-2.50895e-18	-1.29982e-18	-5.14501e-18	-6.00904e-18	-5.73102e-18	-4.64186e-18	-6.01057e-18	-5.50089e-18	-4.33131e-18	-5.01321e-18	-5.958e-18	-5.24481e-18	-5.79179e-18	-5.89213e-18	0	0	0	0	1	0.459475	0.476479	0.581489	0.0385187	0.0361033	0.0256731	0.0306954
sn1_5	0	0	0	-1.1618e-18	-2.08067e-18	-1.07794e-18	-4.26676e-18	-4.9833e-18	-4.75274e-18	-3.8495e-18	-4.98457e-18	-4.56189e-18	-3.59196e-18	-4.15746e-18	-4.94097e-18	-4.34952e-18	-4.80314e-18	-4.88635e-18	0	0	0	0	0.459475	1	0.395145	0.482229	0.0319436	0.0299405	0.0212907	0.0254557
sn9_1	0	0	0	-1.20479e-18	-2.15768e-18	-1.11783e-18	-4.42467e-18	-5.16773e-18	-4.92863e-18	-3.99196e-18	-5.16904e-18	-4.73072e-18	-3.7249e-18	-4.31132e-18	-5.12383e-18	-4.51049e-18	-4.9809e-18	-5.06719e-18	0	0	0	0	0.476479	0.395145	1	0.500076	0.0331258	0.0310486	0.0220787	0.0263978
sn9_2	0	0	0	-1.47031e-18	-2.6332e-18	-1.36419e-18	-5.3998e-18	-6.30663e-18	-6.01483e-18	-4.87174e-18	-6.30823e-18	-5.7733e-18	-4.54581e-18	-5.26147e-18	-6.25305e-18	-5.50454e-18	-6.07862e-18	-6.18392e-18	0	0	0	0	0.581489	0.482229	0.500076	1	0.0404262	0.0378912	0.0269445	0.0322156
int2_1	-0.234063	0.263051	0.240367	0.499884	0.895249	0.463803	0.440586	0.514577	0.490768	0.3975	0.514707	0.471061	0.370906	0.429299	0.510205	0.449132	0.495973	0.504565	0.297994	-0.334117	0.343839	-0.264575	0.0385187	0.0319436	0.0331258	0.0404262	1	0.773228	0.549843	0.657407
int2_2	-0.219385	0.246556	0.225295	0.468538	0.839111	0.43472	0.412958	0.482309	0.459994	0.372574	0.482432	0.441523	0.347648	0.402379	0.478212	0.420969	0.464872	0.472925	0.279308	-0.313166	0.322278	-0.247985	0.0361033	0.0299405	0.0310486	0.0378912	0.773228	1	0.515364	0.616184
int2_3	-0.156005	0.175326	0.160207	0.333178	0.596692	0.309129	0.293655	0.342971	0.327102	0.264938	0.343058	0.313967	0.247213	0.286132	0.340057	0.299351	0.330571	0.336298	0.198616	-0.222693	0.229173	-0.176342	0.0256731	0.0212907	0.0220787	0.0269445	0.549843	0.515364	1	0.438169
int2_4	-0.186524	0.209625	0.191548	0.398357	0.713421	0.369603	0.351102	0.410065	0.391092	0.316766	0.410169	0.375387	0.295574	0.342108	0.406581	0.357912	0.395239	0.402086	0.237471	-0.266257	0.274005	-0.210839	0.0306954	0.0254557	0.0263978	0.0322156	0.657407	0.616184	0.438169	1

## Sheet: Model 2
	g2	g2a	g2b	att4_2	att4_4	att4_5	att4_7	att316_1	att4_1	att4_3	att4_6	att4_8	att4_12	att4_13	att316_2	pbc1_1	pbc1_5r	pbc1_6	pbc1_7r	int2_1	int2_2	int2_3	int2_4
g2	1	1.32496	0.686401	-1.9743e-17	-2.37215e-17	-2.26637e-17	-1.84723e-17	-2.37398e-17	-2.1763e-17	-1.65766e-17	-1.9909e-17	-2.36233e-17	-2.08644e-17	-2.31057e-17	-2.32342e-17	0.345271	0.387139	0.398402	0.306552	0.499415	0.469714	0.333566	0.397389
g2a	1.32496	4.12345	1.22934	-3.53594e-17	-4.2485e-17	-4.05905e-17	-3.30838e-17	-4.25177e-17	-3.89774e-17	-2.96885e-17	-3.56569e-17	-4.23091e-17	-3.73678e-17	-4.13821e-17	-4.16121e-17	0.618377	0.693361	0.713533	0.549032	0.894447	0.841253	0.597414	0.71172
g2b	0.686401	1.22934	1	-1.83181e-17	-2.20095e-17	-2.10281e-17	-1.71392e-17	-2.20265e-17	-2.01924e-17	-1.53803e-17	-1.84722e-17	-2.19184e-17	-1.93586e-17	-2.14382e-17	-2.15573e-17	0.320353	0.359199	0.369649	0.284428	0.463372	0.435815	0.309493	0.368709
att4_2	-1.9743e-17	-3.53594e-17	-1.83181e-17	1	0.556541	0.531723	0.433387	0.556969	0.510591	0.388911	0.467094	0.554236	0.489507	0.542093	0.545106	-9.21431e-18	-1.03316e-17	-1.06322e-17	-8.18101e-18	0.427762	0.402322	0.285708	0.340374
att4_4	-2.37215e-17	-4.2485e-17	-2.20095e-17	0.556541	1	0.638875	0.520723	0.669209	0.613485	0.467283	0.561223	0.665924	0.588152	0.651335	0.654955	-1.10712e-17	-1.24137e-17	-1.27748e-17	-9.82964e-18	0.513964	0.483398	0.343284	0.408966
att4_5	-2.26637e-17	-4.05905e-17	-2.10281e-17	0.531723	0.638875	1	0.497503	0.639367	0.586128	0.446446	0.536196	0.636229	0.561925	0.622291	0.625749	-1.05775e-17	-1.18601e-17	-1.22052e-17	-9.39131e-18	0.491045	0.461842	0.327976	0.390729
att4_7	-1.84723e-17	-3.30838e-17	-1.71392e-17	0.433387	0.520723	0.497503	1	0.521124	0.477731	0.363881	0.437033	0.518566	0.458004	0.507206	0.510024	-8.6213e-18	-9.66672e-18	-9.94796e-18	-7.6545e-18	0.400232	0.37643	0.267321	0.318469
att316_1	-2.37398e-17	-4.25177e-17	-2.20265e-17	0.556969	0.669209	0.639367	0.521124	1	0.613957	0.467643	0.561654	0.666437	0.588605	0.651837	0.655459	-1.10797e-17	-1.24232e-17	-1.27846e-17	-9.8372e-18	0.51436	0.48377	0.343548	0.409281
att4_1	-2.1763e-17	-3.89774e-17	-2.01924e-17	0.510591	0.613485	0.586128	0.477731	0.613957	1	0.428703	0.514887	0.610944	0.539593	0.59756	0.600881	-1.01571e-17	-1.13888e-17	-1.17201e-17	-9.01808e-18	0.47153	0.443487	0.314942	0.375201
att4_3	-1.65766e-17	-2.96885e-17	-1.53803e-17	0.388911	0.467283	0.446446	0.363881	0.467643	0.428703	1	0.392182	0.465348	0.411001	0.455153	0.457683	-7.73653e-18	-8.67466e-18	-8.92704e-18	-6.86895e-18	0.359158	0.337798	0.239887	0.285785
att4_6	-1.9909e-17	-3.56569e-17	-1.84722e-17	0.467094	0.561223	0.536196	0.437033	0.561654	0.514887	0.392182	1	0.558898	0.493625	0.546654	0.549692	-9.29182e-18	-1.04186e-17	-1.07217e-17	-8.24983e-18	0.431361	0.405707	0.288112	0.343238
att4_8	-2.36233e-17	-4.23091e-17	-2.19184e-17	0.554236	0.665924	0.636229	0.518566	0.666437	0.610944	0.465348	0.558898	1	0.585716	0.648638	0.652242	-1.10253e-17	-1.23622e-17	-1.27219e-17	-9.78892e-18	0.511836	0.481396	0.341862	0.407272
att4_12	-2.08644e-17	-3.73678e-17	-1.93586e-17	0.489507	0.588152	0.561925	0.458004	0.588605	0.539593	0.411001	0.493625	0.585716	1	0.572884	0.576068	-9.73768e-18	-1.09185e-17	-1.12361e-17	-8.64569e-18	0.452059	0.425174	0.301937	0.359707
att4_13	-2.31057e-17	-4.13821e-17	-2.14382e-17	0.542093	0.651335	0.622291	0.507206	0.651837	0.59756	0.455153	0.546654	0.648638	0.572884	1	0.637953	-1.07838e-17	-1.20914e-17	-1.24432e-17	-9.57447e-18	0.500622	0.470849	0.334373	0.39835
att316_2	-2.32342e-17	-4.16121e-17	-2.15573e-17	0.545106	0.654955	0.625749	0.510024	0.655459	0.600881	0.457683	0.549692	0.652242	0.576068	0.637953	1	-1.08437e-17	-1.21586e-17	-1.25123e-17	-9.62768e-18	0.503404	0.473466	0.336231	0.400563
pbc1_1	0.345271	0.618377	0.320353	-9.21431e-18	-1.10712e-17	-1.05775e-17	-8.6213e-18	-1.10797e-17	-1.01571e-17	-7.73653e-18	-9.29182e-18	-1.10253e-17	-9.73768e-18	-1.07838e-17	-1.08437e-17	1	0.402483	0.414193	0.318702	0.297725	0.280019	0.198855	0.236902
pbc1_5r	0.387139	0.693361	0.359199	-1.03316e-17	-1.24137e-17	-1.18601e-17	-9.66672e-18	-1.24232e-17	-1.13888e-17	-8.67466e-18	-1.04186e-17	-1.23622e-17	-1.09185e-17	-1.20914e-17	-1.21586e-17	0.402483	1	0.464418	0.357348	0.333827	0.313974	0.222968	0.265629
pbc1_6	0.398402	0.713533	0.369649	-1.06322e-17	-1.27748e-17	-1.22052e-17	-9.94796e-18	-1.27846e-17	-1.17201e-17	-8.92704e-18	-1.07217e-17	-1.27219e-17	-1.12361e-17	-1.24432e-17	-1.25123e-17	0.414193	0.464418	1	0.367745	0.343539	0.323108	0.229455	0.273357
pbc1_7r	0.306552	0.549032	0.284428	-8.18101e-18	-9.82964e-18	-9.39131e-18	-7.6545e-18	-9.8372e-18	-9.01808e-18	-6.86895e-18	-8.24983e-18	-9.78892e-18	-8.64569e-18	-9.57447e-18	-9.62768e-18	0.318702	0.357348	0.367745	1	0.264338	0.248617	0.176555	0.210336
int2_1	0.499415	0.894447	0.463372	0.427762	0.513964	0.491045	0.400232	0.51436	0.47153	0.359158	0.431361	0.511836	0.452059	0.500622	0.503404	0.297725	0.333827	0.343539	0.264338	1	0.773912	0.549592	0.654748
int2_2	0.469714	0.841253	0.435815	0.402322	0.483398	0.461842	0.37643	0.48377	0.443487	0.337798	0.405707	0.481396	0.425174	0.470849	0.473466	0.280019	0.313974	0.323108	0.248617	0.773912	1	0.516906	0.615808
int2_3	0.333566	0.597414	0.309493	0.285708	0.343284	0.327976	0.267321	0.343548	0.314942	0.239887	0.288112	0.341862	0.301937	0.334373	0.336231	0.198855	0.222968	0.229455	0.176555	0.549592	0.516906	1	0.437315
int2_4	0.397389	0.71172	0.368709	0.340374	0.408966	0.390729	0.318469	0.409281	0.375201	0.285785	0.343238	0.407272	0.359707	0.39835	0.400563	0.236902	0.265629	0.273357	0.210336	0.654748	0.615808	0.437315	1

## Sheet: Model 3
	g2	g2a	g2b	att4_1	att4_2	att4_3	att4_4	att4_5	att4_6	att4_7	att4_8	att4_12	att4_13	att316_1	att316_2	pbc1_1	pbc1_5r	pbc1_6	pbc1_7r	int2_1	int2_2	int2_3	int2_4
g2	1	1.22976	0.652946	0.276549	0.236565	0.191993	0.301052	0.287238	0.253399	0.234972	0.302142	0.268454	0.295902	0.282025	0.269237	0.372347	0.343943	0.317449	0.249562	0.451083	0.424228	0.301672	0.358776
g2a	1.22976	4.12344	1.3315	0.563946	0.482409	0.391517	0.613913	0.585742	0.516737	0.479161	0.616135	0.547437	0.60341	0.575112	0.549035	0.759299	0.701377	0.64735	0.508912	0.91986	0.865095	0.615178	0.731624
g2b	0.652946	1.3315	1	0.29943	0.256138	0.207878	0.325961	0.311003	0.274364	0.254413	0.32714	0.290664	0.320384	0.305359	0.291513	0.403154	0.3724	0.343714	0.270209	0.488404	0.459327	0.326632	0.38846
att4_1	0.276549	0.563946	0.29943	1	0.488348	0.396336	0.62147	0.592952	0.523098	0.485059	0.623719	0.554175	0.610837	0.582191	0.555793	0.164417	0.151875	0.140176	0.110199	0.481942	0.45325	0.32231	0.38332
att4_2	0.236565	0.482409	0.256138	0.488348	1	0.610102	0.531617	0.507222	0.447468	0.414928	0.533541	0.474052	0.522522	0.498017	0.475435	0.140646	0.129917	0.119909	0.0942661	0.412262	0.387718	0.27571	0.327899
att4_3	0.191993	0.391517	0.207878	0.396336	0.610102	1	0.431453	0.411655	0.363159	0.33675	0.433015	0.384734	0.424071	0.404184	0.385857	0.114146	0.105438	0.0973166	0.0765051	0.334586	0.314667	0.223763	0.266118
att4_4	0.301052	0.613913	0.325961	0.62147	0.531617	0.431453	1	0.64549	0.569447	0.528037	0.678983	0.603278	0.66496	0.633776	0.605038	0.178985	0.165332	0.152596	0.119963	0.524644	0.49341	0.350868	0.417284
att4_5	0.287238	0.585742	0.311003	0.592952	0.507222	0.411655	0.64549	1	0.543316	0.503806	0.647826	0.575594	0.634446	0.604693	0.577274	0.170772	0.157745	0.145594	0.114458	0.50057	0.470768	0.334768	0.398136
att4_6	0.253399	0.516737	0.274364	0.523098	0.447468	0.363159	0.569447	0.543316	1	0.444454	0.571508	0.507785	0.559704	0.533456	0.509267	0.150654	0.139161	0.128442	0.100974	0.441599	0.415308	0.29533	0.351232
att4_7	0.234972	0.479161	0.254413	0.485059	0.414928	0.33675	0.528037	0.503806	0.444454	1	0.529948	0.470859	0.519003	0.494663	0.472234	0.139698	0.129042	0.119102	0.0936313	0.409486	0.385107	0.273853	0.325691
att4_8	0.302142	0.616135	0.32714	0.623719	0.533541	0.433015	0.678983	0.647826	0.571508	0.529948	1	0.605461	0.667367	0.63607	0.607228	0.179633	0.16593	0.153148	0.120397	0.526543	0.495195	0.352138	0.418794
att4_12	0.268454	0.547437	0.290664	0.554175	0.474052	0.384734	0.603278	0.575594	0.507785	0.470859	0.605461	1	0.592956	0.565149	0.539523	0.159604	0.147429	0.136072	0.106973	0.467834	0.439982	0.312875	0.372099
att4_13	0.295902	0.60341	0.320384	0.610837	0.522522	0.424071	0.66496	0.634446	0.559704	0.519003	0.667367	0.592956	1	0.622933	0.594687	0.175923	0.162503	0.149985	0.11791	0.515668	0.484968	0.344865	0.410145
att316_1	0.282025	0.575112	0.305359	0.582191	0.498017	0.404184	0.633776	0.604693	0.533456	0.494663	0.63607	0.565149	0.622933	1	0.785854	0.167673	0.154882	0.142952	0.112381	0.491485	0.462225	0.328692	0.39091
att316_2	0.269237	0.549035	0.291513	0.555793	0.475435	0.385857	0.605038	0.577274	0.509267	0.472234	0.607228	0.539523	0.594687	0.785854	1	0.16007	0.147859	0.13647	0.107285	0.4692	0.441266	0.313788	0.373185
pbc1_1	0.372347	0.759299	0.403154	0.164417	0.140646	0.114146	0.178985	0.170772	0.150654	0.139698	0.179633	0.159604	0.175923	0.167673	0.16007	1	0.232319	0.495754	0.389736	0.359577	0.33817	0.240476	0.285995
pbc1_5r	0.343943	0.701377	0.3724	0.151875	0.129917	0.105438	0.165332	0.157745	0.139161	0.129042	0.16593	0.147429	0.162503	0.154882	0.147859	0.232319	1	0.457936	0.360005	0.332147	0.312373	0.222131	0.264178
pbc1_6	0.317449	0.64735	0.343714	0.140176	0.119909	0.0973166	0.152596	0.145594	0.128442	0.119102	0.153148	0.136072	0.149985	0.142952	0.13647	0.495754	0.457936	1	0.332274	0.306562	0.288311	0.205021	0.243829
pbc1_7r	0.249562	0.508912	0.270209	0.110199	0.0942661	0.0765051	0.119963	0.114458	0.100974	0.0936313	0.120397	0.106973	0.11791	0.112381	0.107285	0.389736	0.360005	0.332274	1	0.241003	0.226655	0.161176	0.191685
int2_1	0.451083	0.91986	0.488404	0.481942	0.412262	0.334586	0.524644	0.50057	0.441599	0.409486	0.526543	0.467834	0.515668	0.491485	0.4692	0.359577	0.332147	0.306562	0.241003	1	0.77384	0.550285	0.654448
int2_2	0.424228	0.865095	0.459327	0.45325	0.387718	0.314667	0.49341	0.470768	0.415308	0.385107	0.495195	0.439982	0.484968	0.462225	0.441266	0.33817	0.312373	0.288311	0.226655	0.77384	1	0.517524	0.615485
int2_3	0.301672	0.615178	0.326632	0.32231	0.27571	0.223763	0.350868	0.334768	0.29533	0.273853	0.352138	0.312875	0.344865	0.328692	0.313788	0.240476	0.222131	0.205021	0.161176	0.550285	0.517524	1	0.437678
int2_4	0.358776	0.731624	0.38846	0.38332	0.327899	0.266118	0.417284	0.398136	0.351232	0.325691	0.418794	0.372099	0.410145	0.39091	0.373185	0.285995	0.264178	0.243829	0.191685	0.654448	0.615485	0.437678	1

## Sheet: 95% lower
	g2	g2a	g2b	att4_1	att4_2	att4_3	att4_4	att4_5	att4_6	att4_7	att4_8	att4_12	att4_13	att316_1	att316_2	pbc1_1	pbc1_5r	pbc1_6	pbc1_7r	int2_1	int2_2	int2_3	int2_4
g2	1	0.942443	0.622125	0.288088	0.248459	0.19794	0.293112	0.300854	0.248264	0.245835	0.306852	0.242138	0.30336	0.266757	0.265918	0.293862	0.284834	0.180443	0.174404	0.440048	0.380426	0.272209	0.363207
g2a	0.942443	2.52944	0.908021	0.420478	0.362638	0.288903	0.427811	0.43911	0.362353	0.358808	0.447866	0.353413	0.442769	0.389345	0.388119	0.428906	0.415728	0.263365	0.25455	0.642272	0.55525	0.397302	0.530117
g2b	0.622125	0.908021	1	0.277565	0.239385	0.19071	0.282406	0.289865	0.239197	0.236856	0.295645	0.233295	0.29228	0.257014	0.256205	0.283129	0.27443	0.173853	0.168034	0.423976	0.366532	0.262267	0.349941
att4_1	0.288088	0.420478	0.277565	1	0.555957	0.442915	0.655873	0.673196	0.555521	0.550086	0.686619	0.541814	0.678805	0.596901	0.595022	0.038686	0.0374974	0.0237547	0.0229597	0.448348	0.387601	0.277343	0.370057
att4_2	0.248459	0.362638	0.239385	0.555957	1	0.576132	0.565654	0.580594	0.479105	0.474418	0.59217	0.467284	0.585431	0.514794	0.513173	0.0333645	0.0323394	0.0204871	0.0198014	0.386675	0.334284	0.239193	0.319153
att4_3	0.19794	0.288903	0.19071	0.442915	0.576132	1	0.450639	0.462541	0.381689	0.377955	0.471764	0.372271	0.466395	0.410121	0.40883	0.0265805	0.0257638	0.0163215	0.0157752	0.308052	0.266314	0.190558	0.25426
att4_4	0.293112	0.427811	0.282406	0.655873	0.565654	0.450639	1	0.684937	0.565209	0.55968	0.698594	0.551263	0.690644	0.607312	0.6054	0.0393607	0.0381514	0.024169	0.0233601	0.456168	0.394362	0.28218	0.376511
att4_5	0.300854	0.43911	0.289865	0.673196	0.580594	0.462541	0.684937	1	0.580137	0.574462	0.717045	0.565823	0.708885	0.623352	0.62139	0.0404003	0.0391591	0.0248074	0.0239771	0.468216	0.404777	0.289633	0.386455
att4_6	0.248264	0.362353	0.239197	0.555521	0.479105	0.381689	0.565209	0.580137	1	0.474045	0.591705	0.466917	0.584971	0.514389	0.51277	0.0333383	0.032314	0.020471	0.0197859	0.386371	0.334022	0.239005	0.318903
att4_7	0.245835	0.358808	0.236856	0.550086	0.474418	0.377955	0.55968	0.574462	0.474045	1	0.585916	0.462349	0.579248	0.509357	0.507754	0.0330121	0.0319979	0.0202708	0.0195923	0.382591	0.330754	0.236666	0.315783
att4_8	0.306852	0.447866	0.295645	0.686619	0.59217	0.471764	0.698594	0.717045	0.591705	0.585916	1	0.577105	0.723019	0.635781	0.633779	0.0412058	0.0399398	0.025302	0.0244552	0.477551	0.412848	0.295408	0.394161
att4_12	0.242138	0.353413	0.233295	0.541814	0.467284	0.372271	0.551263	0.565823	0.466917	0.462349	0.577105	1	0.570537	0.501697	0.500118	0.0325157	0.0315167	0.0199659	0.0192977	0.376838	0.32578	0.233107	0.311034
att4_13	0.30336	0.442769	0.29228	0.678805	0.585431	0.466395	0.690644	0.708885	0.584971	0.579248	0.723019	0.570537	1	0.628545	0.626567	0.0407369	0.0394853	0.0250141	0.0241768	0.472117	0.40815	0.292046	0.389675
att316_1	0.266757	0.389345	0.257014	0.596901	0.514794	0.410121	0.607312	0.623352	0.514389	0.509357	0.635781	0.501697	0.628545	1	0.803488	0.0358216	0.0347211	0.0219959	0.0212597	0.415152	0.358903	0.256808	0.342657
att316_2	0.265918	0.388119	0.256205	0.595022	0.513173	0.40883	0.6054	0.62139	0.51277	0.507754	0.633779	0.500118	0.626567	0.803488	1	0.0357089	0.0346118	0.0219267	0.0211928	0.413845	0.357773	0.256	0.341579
pbc1_1	0.293862	0.428906	0.283129	0.038686	0.0333645	0.0265805	0.0393607	0.0404003	0.0333383	0.0330121	0.0412058	0.0325157	0.0407369	0.0358216	0.0357089	1	0.0648309	0.340181	0.328795	0.222516	0.192368	0.137646	0.18366
pbc1_5r	0.284834	0.415728	0.27443	0.0374974	0.0323394	0.0257638	0.0381514	0.0391591	0.032314	0.0319979	0.0399398	0.0315167	0.0394853	0.0347211	0.0346118	0.0648309	1	0.329729	0.318693	0.21568	0.186458	0.133417	0.178018
pbc1_6	0.180443	0.263365	0.173853	0.0237547	0.0204871	0.0163215	0.024169	0.0248074	0.020471	0.0202708	0.025302	0.0199659	0.0250141	0.0219959	0.0219267	0.340181	0.329729	1	0.201893	0.136634	0.118122	0.0845203	0.112775
pbc1_7r	0.174404	0.25455	0.168034	0.0229597	0.0198014	0.0157752	0.0233601	0.0239771	0.0197859	0.0195923	0.0244552	0.0192977	0.0241768	0.0212597	0.0211928	0.328795	0.318693	0.201893	1	0.132061	0.114168	0.0816913	0.109
int2_1	0.440048	0.642272	0.423976	0.448348	0.386675	0.308052	0.456168	0.468216	0.386371	0.382591	0.477551	0.376838	0.472117	0.415152	0.413845	0.222516	0.21568	0.136634	0.132061	1	0.70719	0.50602	0.67518
int2_2	0.380426	0.55525	0.366532	0.387601	0.334284	0.266314	0.394362	0.404777	0.334022	0.330754	0.412848	0.32578	0.40815	0.358903	0.357773	0.192368	0.186458	0.118122	0.114168	0.70719	1	0.43746	0.5837
int2_3	0.272209	0.397302	0.262267	0.277343	0.239193	0.190558	0.28218	0.289633	0.239005	0.236666	0.295408	0.233107	0.292046	0.256808	0.256	0.137646	0.133417	0.0845203	0.0816913	0.50602	0.43746	1	0.417658
int2_4	0.363207	0.530117	0.349941	0.370057	0.319153	0.25426	0.376511	0.386455	0.318903	0.315783	0.394161	0.311034	0.389675	0.342657	0.341579	0.18366	0.178018	0.112775	0.109	0.67518	0.5837	0.417658	1

## Sheet: Median
	g2	g2a	g2b	att4_1	att4_2	att4_3	att4_4	att4_5	att4_6	att4_7	att4_8	att4_12	att4_13	att316_1	att316_2	pbc1_1	pbc1_5r	pbc1_6	pbc1_7r	int2_1	int2_2	int2_3	int2_4
g2	1	0.983337	0.586877	0.264095	0.239668	0.169296	0.267013	0.267931	0.236325	0.22026	0.275566	0.21916	0.265511	0.236945	0.230068	0.239196	0.25468	0.208924	0.214128	0.484343	0.415197	0.313647	0.392821
g2a	0.983337	2.445	0.868702	0.390916	0.354759	0.250594	0.395236	0.396594	0.349811	0.326031	0.407896	0.324403	0.393013	0.350729	0.340549	0.354061	0.37698	0.309251	0.316954	0.716929	0.61458	0.464264	0.581458
g2b	0.586877	0.868702	1	0.233307	0.211728	0.14956	0.235885	0.236696	0.208775	0.194582	0.243441	0.193611	0.234559	0.209323	0.203247	0.211311	0.22499	0.184568	0.189165	0.427879	0.366795	0.277083	0.347027
att4_1	0.264095	0.390916	0.233307	1	0.612715	0.432808	0.682623	0.684968	0.604168	0.563097	0.704489	0.560286	0.678784	0.605754	0.588172	0.0279089	0.0297155	0.0243768	0.024984	0.465167	0.398759	0.30123	0.377269
att4_2	0.239668	0.354759	0.211728	0.612715	1	0.599415	0.619486	0.621614	0.548287	0.511015	0.639329	0.508464	0.616002	0.549726	0.53377	0.0253276	0.0269671	0.0221221	0.0226731	0.422142	0.361877	0.273368	0.342374
att4_3	0.169296	0.250594	0.14956	0.432808	0.599415	1	0.43759	0.439093	0.387297	0.360969	0.451607	0.359167	0.435129	0.388314	0.377043	0.0178908	0.0190489	0.0156265	0.0160158	0.298191	0.255621	0.193101	0.241845
att4_4	0.267013	0.395236	0.235885	0.682623	0.619486	0.43759	1	0.692537	0.610845	0.569319	0.712274	0.566477	0.686285	0.612447	0.594671	0.0282173	0.0300439	0.0246461	0.02526	0.470307	0.403166	0.304558	0.381438
att4_5	0.267931	0.396594	0.236696	0.684968	0.621614	0.439093	0.692537	1	0.612943	0.571275	0.714721	0.568423	0.688642	0.614551	0.596714	0.0283143	0.0301471	0.0247308	0.0253468	0.471923	0.404551	0.305605	0.382748
att4_6	0.236325	0.349811	0.208775	0.604168	0.548287	0.387297	0.610845	0.612943	1	0.503887	0.630411	0.501371	0.607409	0.542058	0.526325	0.0249743	0.0265909	0.0218135	0.0223569	0.416254	0.356829	0.269555	0.337598
att4_7	0.22026	0.326031	0.194582	0.563097	0.511015	0.360969	0.569319	0.571275	0.503887	1	0.587556	0.467288	0.566117	0.505209	0.490545	0.0232765	0.0247832	0.0203306	0.020837	0.387957	0.332572	0.251231	0.314648
att4_8	0.275566	0.407896	0.243441	0.704489	0.639329	0.451607	0.712274	0.714721	0.630411	0.587556	1	0.584623	0.708268	0.632066	0.61372	0.0291212	0.0310063	0.0254356	0.0260692	0.485372	0.41608	0.314314	0.393656
att4_12	0.21916	0.324403	0.193611	0.560286	0.508464	0.359167	0.566477	0.568423	0.501371	0.467288	0.584623	1	0.563291	0.502687	0.488096	0.0231603	0.0246595	0.0202292	0.020733	0.38602	0.330912	0.249976	0.313078
att4_13	0.265511	0.393013	0.234559	0.678784	0.616002	0.435129	0.686285	0.688642	0.607409	0.566117	0.708268	0.563291	1	0.609003	0.591327	0.0280586	0.0298749	0.0245075	0.025118	0.467662	0.400898	0.302845	0.379292
att316_1	0.236945	0.350729	0.209323	0.605754	0.549726	0.388314	0.612447	0.614551	0.542058	0.505209	0.632066	0.502687	0.609003	1	0.765354	0.0250398	0.0266607	0.0218708	0.0224155	0.417346	0.357766	0.270262	0.338484
att316_2	0.230068	0.340549	0.203247	0.588172	0.53377	0.377043	0.594671	0.596714	0.526325	0.490545	0.61372	0.488096	0.591327	0.765354	1	0.024313	0.0258868	0.021236	0.0217649	0.405233	0.347381	0.262418	0.32866
pbc1_1	0.239196	0.354061	0.211311	0.0279089	0.0253276	0.0178908	0.0282173	0.0283143	0.0249743	0.0232765	0.0291212	0.0231603	0.0280586	0.0250398	0.024313	1	0.0850325	0.339562	0.34802	0.253233	0.217082	0.163987	0.205382
pbc1_5r	0.25468	0.37698	0.22499	0.0297155	0.0269671	0.0190489	0.0300439	0.0301471	0.0265909	0.0247832	0.0310063	0.0246595	0.0298749	0.0266607	0.0258868	0.0850325	1	0.361542	0.370548	0.269626	0.231134	0.174602	0.218677
pbc1_6	0.208924	0.309251	0.184568	0.0243768	0.0221221	0.0156265	0.0246461	0.0247308	0.0218135	0.0203306	0.0254356	0.0202292	0.0245075	0.0218708	0.021236	0.339562	0.361542	1	0.303974	0.221184	0.189608	0.143233	0.179389
pbc1_7r	0.214128	0.316954	0.189165	0.024984	0.0226731	0.0160158	0.02526	0.0253468	0.0223569	0.020837	0.0260692	0.020733	0.025118	0.0224155	0.0217649	0.34802	0.370548	0.303974	1	0.226693	0.194331	0.146801	0.183857
int2_1	0.484343	0.716929	0.427879	0.465167	0.422142	0.298191	0.470307	0.471923	0.416254	0.387957	0.485372	0.38602	0.467662	0.417346	0.405233	0.253233	0.269626	0.221184	0.226693	1	0.762257	0.575822	0.721176
int2_2	0.415197	0.61458	0.366795	0.398759	0.361877	0.255621	0.403166	0.404551	0.356829	0.332572	0.41608	0.330912	0.400898	0.357766	0.347381	0.217082	0.231134	0.189608	0.194331	0.762257	1	0.493617	0.618221
int2_3	0.313647	0.464264	0.277083	0.30123	0.273368	0.193101	0.304558	0.305605	0.269555	0.251231	0.314314	0.249976	0.302845	0.270262	0.262418	0.163987	0.174602	0.143233	0.146801	0.575822	0.493617	1	0.467015
int2_4	0.392821	0.581458	0.347027	0.377269	0.342374	0.241845	0.381438	0.382748	0.337598	0.314648	0.393656	0.313078	0.379292	0.338484	0.32866	0.205382	0.218677	0.179389	0.183857	0.721176	0.618221	0.467015	1

## Sheet: 95% upper
	g2	g2a	g2b	att4_1	att4_2	att4_3	att4_4	att4_5	att4_6	att4_7	att4_8	att4_12	att4_13	att316_1	att316_2	pbc1_1	pbc1_5r	pbc1_6	pbc1_7r	int2_1	int2_2	int2_3	int2_4
g2	1	0.976727	0.625543	0.317143	0.285023	0.206868	0.337209	0.344218	0.296448	0.268912	0.349341	0.275218	0.335877	0.317159	0.307328	0.375565	0.337291	0.257634	0.249373	0.4855	0.45453	0.353517	0.416208
g2a	0.976727	2.06182	0.840817	0.426285	0.383111	0.27806	0.453255	0.462677	0.398467	0.361455	0.469562	0.369931	0.451465	0.426305	0.413091	0.504811	0.453366	0.346296	0.335192	0.65258	0.610951	0.475176	0.559442
g2b	0.625543	0.840817	1	0.273013	0.245363	0.178083	0.290286	0.296321	0.255198	0.231493	0.30073	0.236922	0.28914	0.273026	0.264563	0.323305	0.290358	0.221785	0.214673	0.417943	0.391282	0.304325	0.358293
att4_1	0.317143	0.426285	0.273013	1	0.542091	0.393447	0.641344	0.654675	0.56382	0.51145	0.664418	0.523442	0.638811	0.60321	0.584513	0.100303	0.0900814	0.0688072	0.0666008	0.487005	0.455938	0.354613	0.417498
att4_2	0.285023	0.383111	0.245363	0.542091	1	0.635537	0.576389	0.58837	0.506717	0.45965	0.597126	0.470428	0.574113	0.542117	0.525314	0.0901445	0.080958	0.0618384	0.0598555	0.437681	0.409761	0.318698	0.375214
att4_3	0.206868	0.27806	0.178083	0.393447	0.635537	1	0.41834	0.427036	0.367772	0.333611	0.433391	0.341434	0.416688	0.393466	0.38127	0.0654264	0.0587589	0.044882	0.0434428	0.317667	0.297402	0.231309	0.272328
att4_4	0.337209	0.453255	0.290286	0.641344	0.576389	0.41834	1	0.696096	0.599492	0.543808	0.706455	0.55656	0.679228	0.641374	0.621494	0.106649	0.0957807	0.0731605	0.0708146	0.517817	0.484785	0.377048	0.443913
att4_5	0.344218	0.462677	0.296321	0.654675	0.58837	0.427036	0.696096	1	0.611954	0.555112	0.72114	0.568129	0.693347	0.654707	0.634413	0.108866	0.0977717	0.0746813	0.0722866	0.528581	0.494862	0.384886	0.45314
att4_6	0.296448	0.398467	0.255198	0.56382	0.506717	0.367772	0.599492	0.611954	1	0.478074	0.621061	0.489285	0.597125	0.563847	0.54637	0.0937579	0.0842031	0.0643171	0.0622548	0.455225	0.426186	0.331472	0.390254
att4_7	0.268912	0.361455	0.231493	0.51145	0.45965	0.333611	0.543808	0.555112	0.478074	1	0.563373	0.443837	0.541661	0.511474	0.49562	0.0850491	0.0763818	0.0583429	0.0564722	0.412941	0.386599	0.300683	0.354005
att4_8	0.349341	0.469562	0.30073	0.664418	0.597126	0.433391	0.706455	0.72114	0.621061	0.563373	1	0.576584	0.703665	0.66445	0.643854	0.110486	0.0992267	0.0757926	0.0733623	0.536447	0.502226	0.390614	0.459884
att4_12	0.275218	0.369931	0.236922	0.523442	0.470428	0.341434	0.55656	0.568129	0.489285	0.443837	0.576584	1	0.554362	0.523467	0.507242	0.0870434	0.0781728	0.059711	0.0577964	0.422624	0.395664	0.307734	0.362306
att4_13	0.335877	0.451465	0.28914	0.638811	0.574113	0.416688	0.679228	0.693347	0.597125	0.541661	0.703665	0.554362	1	0.638842	0.61904	0.106228	0.0954025	0.0728716	0.070535	0.515772	0.482871	0.375559	0.44216
att316_1	0.317159	0.426305	0.273026	0.60321	0.542117	0.393466	0.641374	0.654707	0.563847	0.511474	0.66445	0.523467	0.638842	1	0.788213	0.100308	0.0900857	0.0688105	0.066604	0.487028	0.45596	0.35463	0.417518
att316_2	0.307328	0.413091	0.264563	0.584513	0.525314	0.38127	0.621494	0.634413	0.54637	0.49562	0.643854	0.507242	0.61904	0.788213	1	0.0971988	0.0872933	0.0666776	0.0645395	0.471932	0.441827	0.343637	0.404577
pbc1_1	0.375565	0.504811	0.323305	0.100303	0.0901445	0.0654264	0.106649	0.108866	0.0937579	0.0850491	0.110486	0.0870434	0.106228	0.100308	0.0971988	1	0.0606048	0.345461	0.334384	0.244722	0.229111	0.178194	0.209795
pbc1_5r	0.337291	0.453366	0.290358	0.0900814	0.080958	0.0587589	0.0957807	0.0977717	0.0842031	0.0763818	0.0992267	0.0781728	0.0954025	0.0900857	0.0872933	0.0606048	1	0.310256	0.300307	0.219783	0.205762	0.160035	0.188415
pbc1_6	0.257634	0.346296	0.221785	0.0688072	0.0618384	0.044882	0.0731605	0.0746813	0.0643171	0.0583429	0.0757926	0.059711	0.0728716	0.0688105	0.0666776	0.345461	0.310256	1	0.229385	0.167877	0.157168	0.12224	0.143917
pbc1_7r	0.249373	0.335192	0.214673	0.0666008	0.0598555	0.0434428	0.0708146	0.0722866	0.0622548	0.0564722	0.0733623	0.0577964	0.070535	0.066604	0.0645395	0.334384	0.300307	0.229385	1	0.162494	0.152129	0.11832	0.139303
int2_1	0.4855	0.65258	0.417943	0.487005	0.437681	0.317667	0.517817	0.528581	0.455225	0.412941	0.536447	0.422624	0.515772	0.487028	0.471932	0.244722	0.219783	0.167877	0.162494	1	0.755116	0.587302	0.691452
int2_2	0.45453	0.610951	0.391282	0.455938	0.409761	0.297402	0.484785	0.494862	0.426186	0.386599	0.502226	0.395664	0.482871	0.45596	0.441827	0.229111	0.205762	0.157168	0.152129	0.755116	1	0.549838	0.647344
int2_3	0.353517	0.475176	0.304325	0.354613	0.318698	0.231309	0.377048	0.384886	0.331472	0.300683	0.390614	0.307734	0.375559	0.35463	0.343637	0.178194	0.160035	0.12224	0.11832	0.587302	0.549838	1	0.503481
int2_4	0.416208	0.559442	0.358293	0.417498	0.375214	0.272328	0.443913	0.45314	0.390254	0.354005	0.459884	0.362306	0.44216	0.417518	0.404577	0.209795	0.188415	0.143917	0.139303	0.691452	0.647344	0.503481	1
